# Supplementary material for: Development of a coupled simulation framework representing the lake and river continuum of mass and energy (TCHOIR v1.0)
Source: Copernicus journal article supplement (doi:10.5194/gmd-14-5669-2021), 2021-09-14
Supplement: Supplementary file 1 [file gmd-14-5669-2021-supplement.pdf]

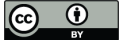

*Supplement of*

**Development of a coupled simulation framework representing the lake and river continuum of mass and energy (TCHOIR v1.0)**

**Daisuke Tokuda et al.**

*Correspondence to:* Daisuke Tokuda (tokuda@civil.t.u-tokyo.ac.jp)

The copyright of individual parts of the supplement might differ from the article licence.

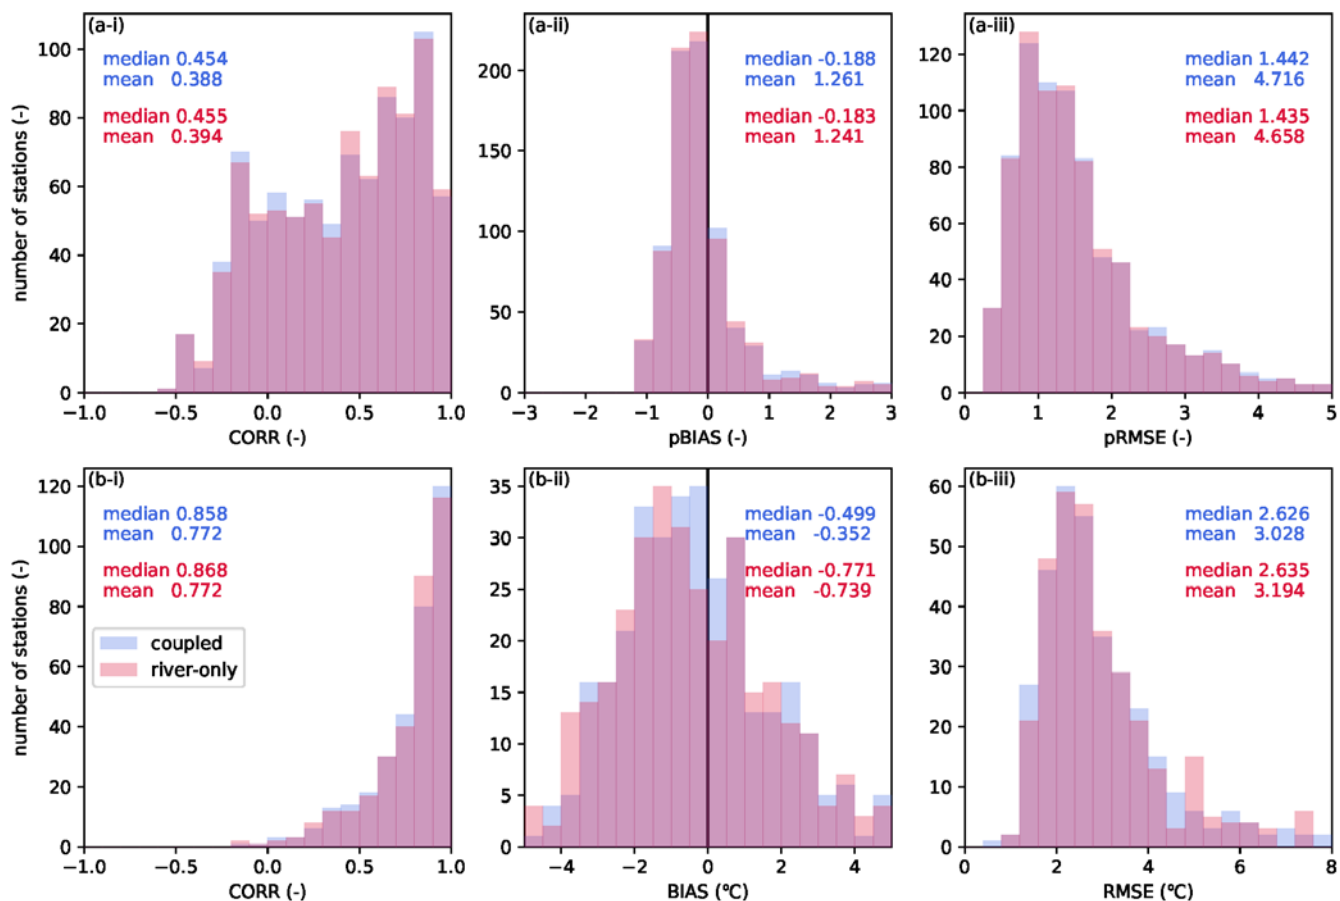

Figure S1: Comparison between reproducibility indices of river discharge and temperature for stations which are not located in downstream area of lakes: bars are the histograms of each index, and the numbers indicate the associated median and mean values, under JRA55-ELSE meteorological forcing dataset. Blue (red) bars and written values show the results of the coupled (river-only) simulation. (a) CORR, (b) (p)BIAS, and (c) (p)RMSE.
